# Supplementary material for: A palladium–carbon-connected organometallic framework and its catalytic application
Source: Royal Society of Chemistry journal article supplement (doi:10.1039/c9cc07829k), 2019-01-01
Supplement: c9cc07829k1.pdf [file c9cc07829k1.pdf]

Supporting Information for

**Palladium-carbon connected organometallic framework and its catalytic application**

Ying Dong<sup>a</sup>, Jing-Jing Jv<sup>a</sup>, Xiao-Wei Wu<sup>b</sup>, Jing-Lan Kan<sup>a</sup>, Ting Lin<sup>a</sup>, Yu-Bin Dong<sup>\*a</sup>

<sup>a</sup> College of Chemistry, Chemical Engineering and Materials Science, Collaborative Innovation Center of Functionalized Probes for Chemical Imaging in Universities of Shandong, Key Laboratory of Molecular and Nano Probes, Ministry of Education, Shandong Normal University, Jinan 250014, P. R. China. E-mail: yubindong@sdsu.edu.cn

<sup>b</sup> School of Chemical Engineering Nanjing University of Science and Technology Nanjing, Jiangsu 210094, P. R. China.

**1. Materials and methods**

**2. Synthesis and characterization of L and its precursors**

**3. Synthesis and characterization of Pd-OMF**

**4. Product characterization and yield determination for the model Suzuki-Miyaura cross-coupling reaction catalyzed by Pd-OMF (for Table 1)**

**5. Recycle of Pd-OMF**

**6. General catalytic procedure for the Pd-OMF promoted Suzuki-Miyaura cross-coupling reaction (for Table 2)**

**7. GC results for the Pd-OMF promoted Suzuki-Miyaura cross-coupling reaction (for Table 2)**

**8. Proposed mechanism**

**9. Reference**

## 1. Materials and methods

All chemicals and solvents were at least of analytic grade and employed as received without further purification. The elemental analysis was conducted on a PerkinElmer Model 2400 analyzer. MS spectra were obtained by Bruker maxis ultra-high resolution-TOF MS system. NMR data were collected using an AM-400 spectrometer. The solid-state NMR spectra were obtained on Agilent 600 DD2 spectrometer. Infrared spectra were obtained in the 400-4000 $\text{cm}^{-1}$  range using a Bruker ALPHA FT-IR spectrometer. Powder X-ray diffraction (PXRD) measurements were performed at 293K on a D8 ADVANCE diffractometer (Cu  $K\alpha$ ,  $\lambda = 1.5406\text{\AA}$ ). ICP analysis was performed on an IRIS InterpidII XSP and NU AttoM. XPS spectra were obtained from PHI Versaprobe II. Thermogravimetric analyses were carried out on a TA Instrument Q5 simultaneous TGA under flowing nitrogen at a heating rate of 10 $^{\circ}\text{C}/\text{min}$ . HRTEM (High resolution transmission electron microscopy) analysis was performed on a JEOL 2100 Electron Microscope at an operating voltage of 200 kV. The scanning electron microscopy (SEM) micrographs were recorded on a Gemini Zeiss Supra TM scanning electron microscope equipped with energy-dispersive X-ray detector (EDX). The elemental analysis was conducted on a PerkinElmer Model 2400 analyzer.

## 2. Synthesis and characterization of L and its precursors.

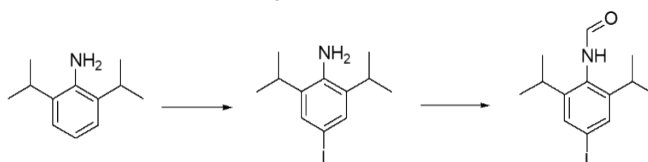

**Synthesis of 4-iodo-2,6-diisopropylaniline.<sup>1</sup>** A mixture of 2,6-diisopropylaniline (2.54 g, 14.3 mmol) and I<sub>2</sub> (4.0 g, 15.7 mmol) was charged in 50 mL round-bottom flask. Then, 10 mL cyclohexane and 4 mL saturated Na<sub>2</sub>CO<sub>3</sub> solution was added orderly. After stirring at room temperature for 12 h, the mixture was diluted with EtOAc (20 mL) and washed with saturated Na<sub>2</sub>S<sub>2</sub>O<sub>3</sub> (3 × 40 mL). The combined organic layer was dried with anhydrous MgSO<sub>4</sub>. The crude product was purified by column chromatography (petroleum ether /EtOAc = 10/1) to give 4-iodo-2,6-diisopropylaniline as a deep brown oil (3.90 g, yield: 96%). <sup>1</sup>H NMR (400 MHz, CDCl<sub>3</sub>)  $\delta$ : 7.37 (s, 2H), 3.82 (s, 2H), 2.94 (m, 2H), 1.37 (d,  $J = 8.0$  Hz, 12 H); <sup>13</sup>C NMR (400 MHz, CDCl<sub>3</sub>)  $\delta$ : 22.4 (4C), 28.0 (2C), 81.2 (1C), 131.8 (2C), 135.1 (2C), 140.2 (1C); HRMS (ESI-TOF) calcd for C<sub>12</sub>H<sub>19</sub>I (M+H)<sup>+</sup>,  $m/z$  304.0517; found,  $m/z$  304.0592; IR (KBr): 3486 (w), 3404 (w), 2961 (vs), 2870 (m), 1618 (s), 1570 (w), 1460 (s), 1438 (vs), 1384 (m), 1364 (m), 1350 (m), 1299 (w), 1250 (m), 1208 (m), 1125 (w), 1061 (w), 924 (w), 865 (m), 832 (w), 765 (w), 746 (w), 716 (w), 555 (w).

**Synthesis of N-(4-iodo-2,6-diisopropylphenyl)formamide.<sup>2</sup>** A mixture of formic acid (3.0 mL, 81.2 mmol) and acetic anhydride (3.0 mL, 31.8 mmol) was stirred at 55  $^{\circ}\text{C}$  for 3 h. After cooling to room temperature, 4-iodo-2,6-diisopropylaniline (4.48 g, 14.7 mmol) was gradually added using a water bath to keep the temperature below 39  $^{\circ}\text{C}$ . After cooling to room temperature and addition of anhydrous diethyl ether (10 mL), the mixture was stirred for additional 40 h at room temperature. Next, 10 % aqueous sodium carbonate was added to neutralize the mixture. The product was extracted by diethyl ether and the combined organic layer was dried with anhydrous MgSO<sub>4</sub>. The crude product was purified by Al<sub>2</sub>O<sub>3</sub> (petroleum ether /EtOAc = 20/1) to give white solid (4.48 g, yield: 92%). <sup>1</sup>H NMR (400 MHz, DMSO)  $\delta$ : 9.55 (s, 1H), 8.35 (s, 1H), 7.52 (s, 2H), 3.30 (m, 2H), 1.15 (d,  $J = 8.0$  Hz, 12H); <sup>13</sup>C NMR (400 MHz, DMSO)  $\delta$ : 161.2 (1C), 149.0 (2C), 132.4 (2C), 131.9 (1C), 97.9 (1C), 28.5 (2C), 23.5 (4C); HRMS (ESI-TOF) calcd for C<sub>13</sub>H<sub>18</sub>INO (M+Na)<sup>+</sup>,  $m/z$  354.0331, found 354.0371; IR

(KBr): 3174 (m), 2963 (s), 2864 (m), 2768 (w), 2161 (w), 2026 (w), 1599 (m), 1579 (m), 1463 (m), 1418 (m), 1386 (w), 1365 (w), 1345 (w), 1262 (m), 1172 (m), 1109 (w), 1074 (w), 1001 (m), 944 (w), 882 (m), 802 (w), 723 (w), 695 (w), 680 (w).

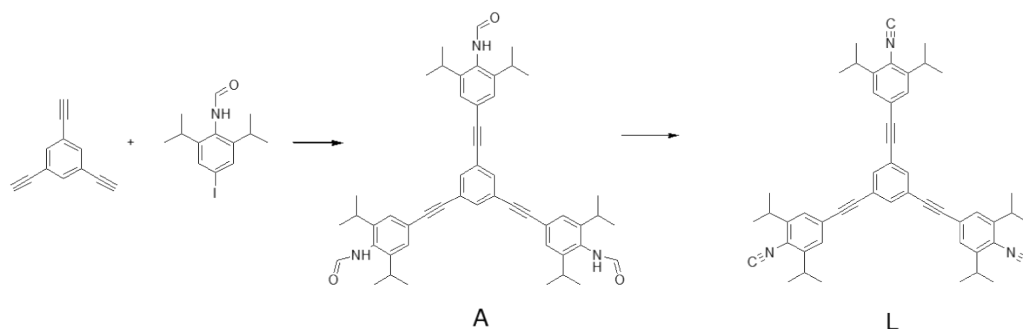

**Synthesis of N,N',N''-((benzene-1,3,5-triyltris(ethyne-2,1-diyl))tris(2,6-diisopropylbenzene-4,1-diyl))triformamide (A).**<sup>3</sup> A mixture of 1,3,5-triethynylbenzene (0.150 g, 1.0 mmol), *N*-(4-iodo-2,6-diisopropylphenyl)formamide (0.994 g, 3.0 mmol), bis(triphenylphosphine)palladium(II) dichloride (0.071 g, 0.1 mmol), copper(I) iodide (0.057 g, 0.3 mmol), diisopropylethylamine (DIPEA, 0.452 mL, 3 mmol) in 20 mL THF was charged in a 100 mL Schlenk flask. After stirred at 50 °C for 14 h, the precipitate was filtered and washed with CH<sub>2</sub>Cl<sub>2</sub> to remove salts and redundant starting materials. The crude product was purified by Al<sub>2</sub>O<sub>3</sub> (methanol/ CH<sub>2</sub>Cl<sub>2</sub> = 200/1) to give **A** (0.494 g, yield: 64%). <sup>1</sup>H NMR (400 MHz, DMSO) δ: 9.57 (s, 3H), 8.35 (s, 3H), 7.83 (s, 3H), 7.41 (s, 6H), 3.09 (m, 6H), 1.17 (d, *J* = 8.0 Hz, 36H); <sup>13</sup>C NMR (400 MHz, DMSO), δ: 161.1 (3c), 147.0 (6c), 134.1 (3c), 130.0 (3c), 126.9 (6c), 124.4 (3c), 121.6 (3c), 91.8 (3c), 88.3 (3c), 28.6 (6c), 23.6 (12c); HRMS (ESI-TOF) calcd for C<sub>51</sub>H<sub>57</sub>N<sub>3</sub>O<sub>3</sub> ([M+Na]<sup>+</sup>), *m/z* 782.4298; found *m/z* 782.4269; IR (KBr): 3173 (w), 2964 (s), 2864 (m), 2768.19 (w), 1664 (s), 1568 (m), 1537 (m), 1461 (m), 1408 (s), 1392 (s), 1362 (w), 1329 (m), 1281 (w), 1260 (w), 1233 (m), 1155 (w), 1039 (m), 941 (w), 892 (m), 868 (m), 808 (m), 741 (m), 615 (w), 521 (w), 401 (w).

**Synthesis of 1,3,5-tris((4-isocyano-3,5-diisopropylphenyl)ethynyl)benzene L.**<sup>4</sup> A mixture of **A** (0.076 g, 0.1 mmol), triethylamine (0.417 mL, 3 mmol) in 20 mL methylene chloride was cooled to 0 °C. POCl<sub>3</sub> (0.548 mL, 0.6 mmol) was slowly added by constant pressure drip funnel with stirring. The mixture was stirred for 1 h at 0 °C. Then, 10 % aqueous sodium carbonate was added and the solution of methylene chloride was washed several times with saturated sodium chloride solution. The product was purified by column on silica gel to afford colorless oil (0.635 g, yield: 90 %). <sup>1</sup>H NMR (400 MHz, CDCl<sub>3</sub>) δ: 7.64 (s, 1H), 7.25 (s, 2H), 3.29 (m, 2H), 1.24 (d, *J* = 8.0 Hz, 12 H); <sup>13</sup>C NMR (400 MHz, CDCl<sub>3</sub>), δ: 170.4 (3c), 145.4 (6c), 134.4 (3c), 134.1 (3c), 126.8 (6c), 123.8 (3c), 123.7 (3c), 90.2 (3c), 89.1 (3c), 29.8 (6c), 22.5 (12c); HRMS (ESI-TOF) calcd for C<sub>51</sub>H<sub>51</sub>N<sub>3</sub> ([M+H]<sup>+</sup>), *m/z* 706.4161; found *m/z* 706.4158; IR (KBr): 2964 (s), 2927 (s), 2872 (m), 2208.26(w), 2110 (s), 1599 (m), 1579 (m), 1463 (m), 1418 (m), 1386.18(w), 1365 (w), 1345 (w), 1262 (m), 1172 (w), 1109 (w), 1074 (w), 1001 (m), 944 (w), 882 (m), 802 (w), 761 (w), 723 (w), 695 (w), 668 (w), 541 (w).

### 3. Synthesis and characterization of Pd-OMF

**Synthesis of Pd-OMF.** In N<sub>2</sub>, PdI<sub>2</sub> (54 mg, 0.15 mmol) and **L** (70 mg, 0.1 mmol) was suspended in 10 mL acetonitrile. The mixture was stirred for 3 days at 100 °C, then the solvent was removed in vacuum. The resulted solids were further treated by Soxhlet extraction with mixed solution of dichloromethane and acetone (100 mL : 100 mL) for 24 h, and then dried at 110 °C in vacuo to afford light yellow crystals (94 mg, yield: 76 %). IR (KBr): 2963 (s), 2928 (m), 2870 (m), 2181.94(s), 1660 (s),

1567 (w), 1533 (m), 1461 (m), 1408 (w), 1391 (m), 1362 (m), 1280 (w), 1259 (w), 1233 (m), 1154 (w), 1068 (w), 941 (w), 892 (w), 868 (m), 808 (m), 741 (m), 615 (w), 521 (w), 440 (w). Anal. Calcd for the desolvated sample  $C_{51}H_{54}I_3N_3Pd_{1.5}$ : C 49.03, H 4.36, N 3.36. Found: C 49.86, H 4.20, N 3.51. In addition, Pd and I content in **Pd-OMF** were respectively determined as 12.46 (calcd. 12.78 wt%) and 30.54 wt% (calcd. 30.47 wt%) based on ICP measurement.

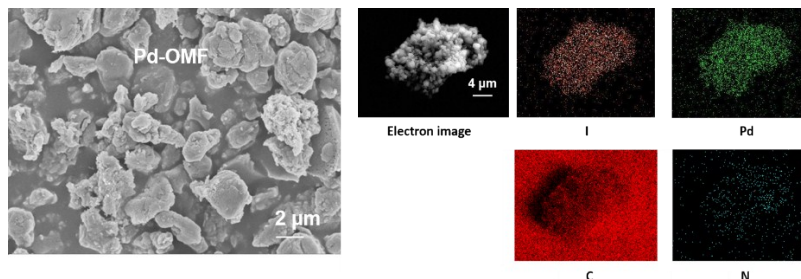

**Fig. S1** Left: SEM image of **Pd-OMF**. Right: SEM-EDX spectrum of **Pd-OMF**.

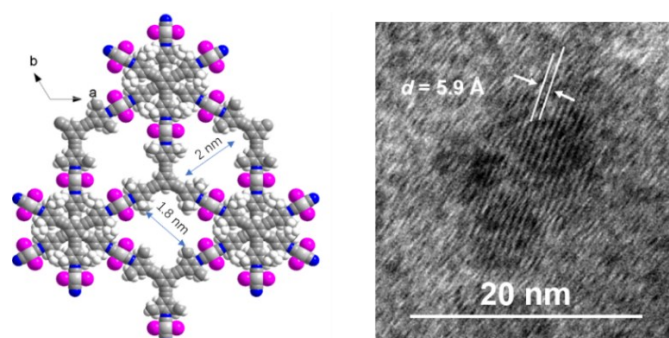

**Fig. S2** Left: 2D layer of **Pd-OMF** with rhombic cavity. Right: TEM image of **Pd-OMF**.

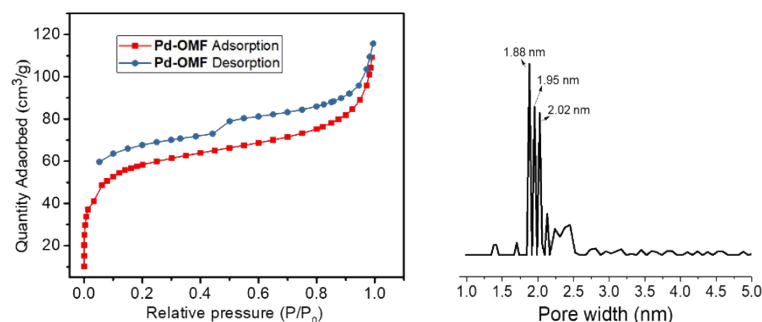

**Fig. S3** Left:  $N_2$  sorption isotherm of **Pd-OMF** at 77K. Right: the pore size distribution plot of **Pd-OMF**.

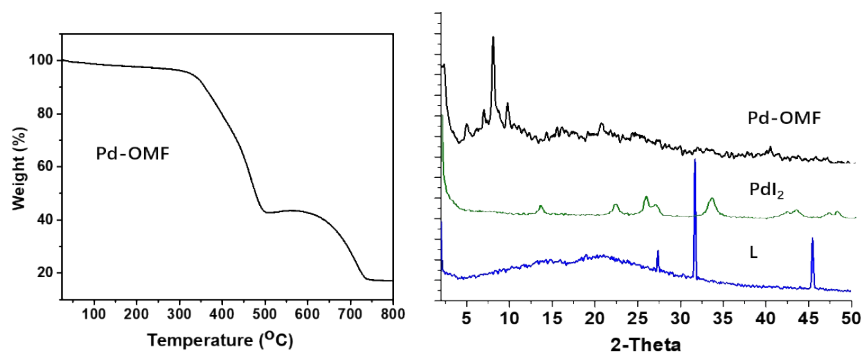

**Fig. S4** Left: TGA trace of **Pd-OMF** (a negligible ca. 2% weight loss below 200 °C is associated with the loss of the encapsulated MeCN in the framework). Right: PXRD patterns of **Pd-OMF**, **L**, and **PdI<sub>2</sub>**.

**Table S1.** **Pd-OMF** with P63/MMC mode

| <b>OMF: Space group: <i>P63/MMC</i></b>              |         |         |          |
|------------------------------------------------------|---------|---------|----------|
| $a = b = 44.596 \text{ \AA}, c = 11.800 \text{ \AA}$ |         |         |          |
| $\alpha = \beta = 90.0^\circ, \gamma = 120.0^\circ$  |         |         |          |
| Atom                                                 | x       | y       | z        |
| C1                                                   | 0.15410 | 0.69445 | -0.35715 |
| C2                                                   | 0.02755 | 0.82089 | -0.35721 |
| H3                                                   | 0.16143 | 0.67405 | -0.35973 |
| H4                                                   | 0.16455 | 0.71099 | -0.43375 |
| H5                                                   | 0.12540 | 0.68171 | -0.35965 |
| H6                                                   | 0.01475 | 0.79219 | -0.35980 |
| H7                                                   | 0.04407 | 0.83132 | -0.43387 |
| H8                                                   | 0.00718 | 0.82825 | -0.35981 |
| C9                                                   | 0.26230 | 0.73770 | -0.25000 |
| C10                                                  | 0.22591 | 0.77409 | -0.25000 |
| N11                                                  | 0.20797 | 0.79203 | -0.25000 |
| C12                                                  | 0.19298 | 0.80702 | -0.25000 |
| Pd13                                                 | 0.16661 | 0.83339 | -0.25000 |
| C14                                                  | 0.14025 | 0.85975 | -0.25000 |
| N15                                                  | 0.12526 | 0.87474 | -0.25000 |
| C16                                                  | 0.10732 | 0.89268 | -0.25000 |
| C17                                                  | 0.07096 | 0.92904 | -0.25000 |
| C18                                                  | 0.05234 | 0.94766 | -0.25000 |
| C19                                                  | 0.28094 | 0.71906 | -0.25000 |
| C20                                                  | 0.29655 | 0.70345 | -0.25000 |
| C21                                                  | 0.31519 | 0.68481 | -0.25000 |
| C22                                                  | 0.03674 | 0.96326 | -0.25000 |
| C23                                                  | 0.01813 | 0.98187 | -0.25000 |
| C24                                                  | 0.28037 | 0.77381 | -0.25000 |
| C25                                                  | 0.26264 | 0.79252 | -0.25000 |
| C26                                                  | 0.07057 | 0.87423 | -0.25000 |
| C27                                                  | 0.05287 | 0.89295 | -0.25000 |
| I28                                                  | 0.10640 | 0.77319 | -0.25000 |
| C29                                                  | 0.16798 | 0.71671 | -0.25000 |
| C30                                                  | 0.04983 | 0.83473 | -0.25000 |
| H31                                                  | 0.30841 | 0.78738 | -0.25000 |
| H32                                                  | 0.02482 | 0.87940 | -0.25000 |
| H33                                                  | 0.15710 | 0.73429 | -0.25000 |
| H34                                                  | 0.06739 | 0.82382 | -0.25000 |
| C35                                                  | 0.35147 | 0.70294 | -0.25000 |
| H36                                                  | 0.36551 | 0.73102 | -0.25000 |
| C37                                                  | 0.03626 | 1.01813 | -0.25000 |
| H38                                                  | 0.06435 | 1.03217 | -0.25000 |

**Table S2.** Pd-OMF with *P6*/MMM mode.

| <b>OMF:</b> Space group: <b><i>P6/MMM</i></b>       |         |         |         |
|-----------------------------------------------------|---------|---------|---------|
| $a = b = 44.597 \text{ \AA}, c = 6.715 \text{ \AA}$ |         |         |         |
| $\alpha = \beta = 90.0^\circ, \gamma = 120.0^\circ$ |         |         |         |
| Atom                                                | x       | y       | z       |
| C1                                                  | 0.48746 | 0.36111 | 0.81180 |
| H2                                                  | 0.49483 | 0.34074 | 0.80682 |
| H3                                                  | 0.49797 | 0.37777 | 0.67796 |
| H4                                                  | 0.45876 | 0.34837 | 0.80712 |
| C5                                                  | 0.59565 | 0.40435 | 1.00000 |
| C6                                                  | 0.55928 | 0.44072 | 1.00000 |
| N7                                                  | 0.54134 | 0.45866 | 1.00000 |
| C8                                                  | 0.52635 | 0.47365 | 1.00000 |
| C9                                                  | 0.38571 | 0.61429 | 1.00000 |
| C10                                                 | 0.62989 | 0.37011 | 1.00000 |
| C11                                                 | 0.64852 | 0.35148 | 1.00000 |
| Pd12                                                | 0.50000 | 0.50000 | 1.00000 |
| C13                                                 | 0.61374 | 0.44046 | 1.00000 |
| C14                                                 | 0.59601 | 0.45917 | 1.00000 |
| C15                                                 | 0.50133 | 0.38334 | 1.00000 |
| H16                                                 | 0.64179 | 0.45403 | 1.00000 |
| H17                                                 | 0.49045 | 0.40093 | 1.00000 |
| I18                                                 | 0.43979 | 0.43979 | 1.00000 |
| C19                                                 | 0.6848  | 0.36961 | 1.00000 |
| H20                                                 | 0.69885 | 0.3977  | 1.00000 |
| C1                                                  | 0.48746 | 0.36111 | 0.81180 |
| H2                                                  | 0.49483 | 0.34074 | 0.80682 |
| H3                                                  | 0.49797 | 0.37777 | 0.67796 |
| H4                                                  | 0.45876 | 0.34837 | 0.80712 |
| C5                                                  | 0.59565 | 0.40435 | 1.00000 |
| C6                                                  | 0.55928 | 0.44072 | 1.00000 |
| N7                                                  | 0.54134 | 0.45866 | 1.00000 |
| C8                                                  | 0.52635 | 0.47365 | 1.00000 |
| C9                                                  | 0.38571 | 0.61429 | 1.00000 |
| C10                                                 | 0.62989 | 0.37011 | 1.00000 |
| C11                                                 | 0.64852 | 0.35148 | 1.00000 |
| Pd12                                                | 0.50000 | 0.50000 | 1.00000 |
| C13                                                 | 0.61374 | 0.44046 | 1.00000 |
| C14                                                 | 0.59601 | 0.45917 | 1.00000 |
| C15                                                 | 0.50133 | 0.38334 | 1.00000 |
| H16                                                 | 0.64179 | 0.45403 | 1.00000 |
| H17                                                 | 0.49045 | 0.40093 | 1.00000 |
| I18                                                 | 0.43979 | 0.43979 | 1.00000 |

#### 4. Product characterization and yield determination for the model Suzuki-Miyaura cross-coupling

reaction catalyzed by Pd-OMF (for Table 1)

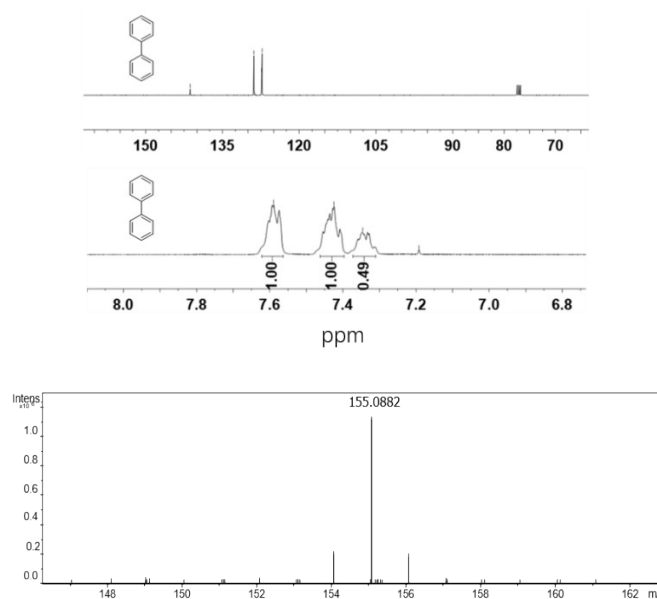

**Fig. S5** NMR and MS spectra for the product generated from the model Suzuki-Miyaura cross-coupling reaction.  $^1\text{H}$  NMR (400 MHz,  $\text{CDCl}_3$ )  $\delta$  = 7.64-7.66 (d,  $J$  = 8.0 Hz, 4H), 7.48-7.50 (m, 4H), 7.38-7.42 (m, 2H);  $^{13}\text{C}$  NMR (400 MHz,  $\text{CDCl}_3$ )  $\delta$  141.1 (2C), 128.8 (4C), 127.3 (2C), 127.2 (4C).; ESI-MS (ESI-MS: calcd for  $\text{C}_{12}\text{H}_{10}$ , 155.0855 ( $[\text{M}+\text{H}]^+$ ); found:  $m/z$  155.0882).

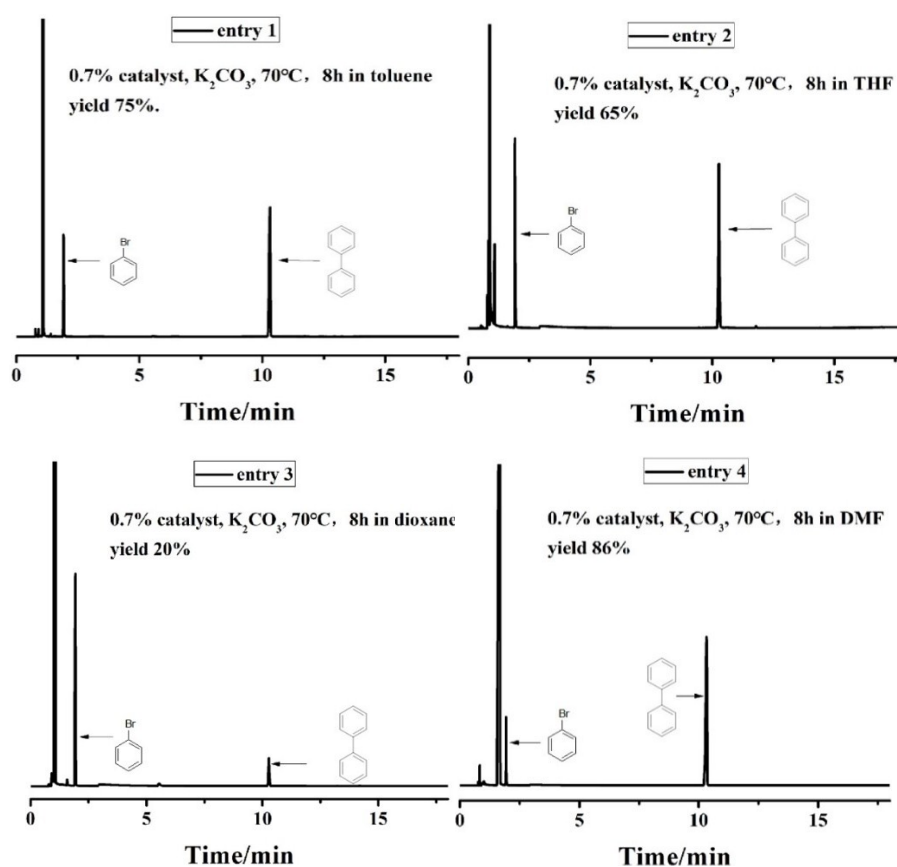

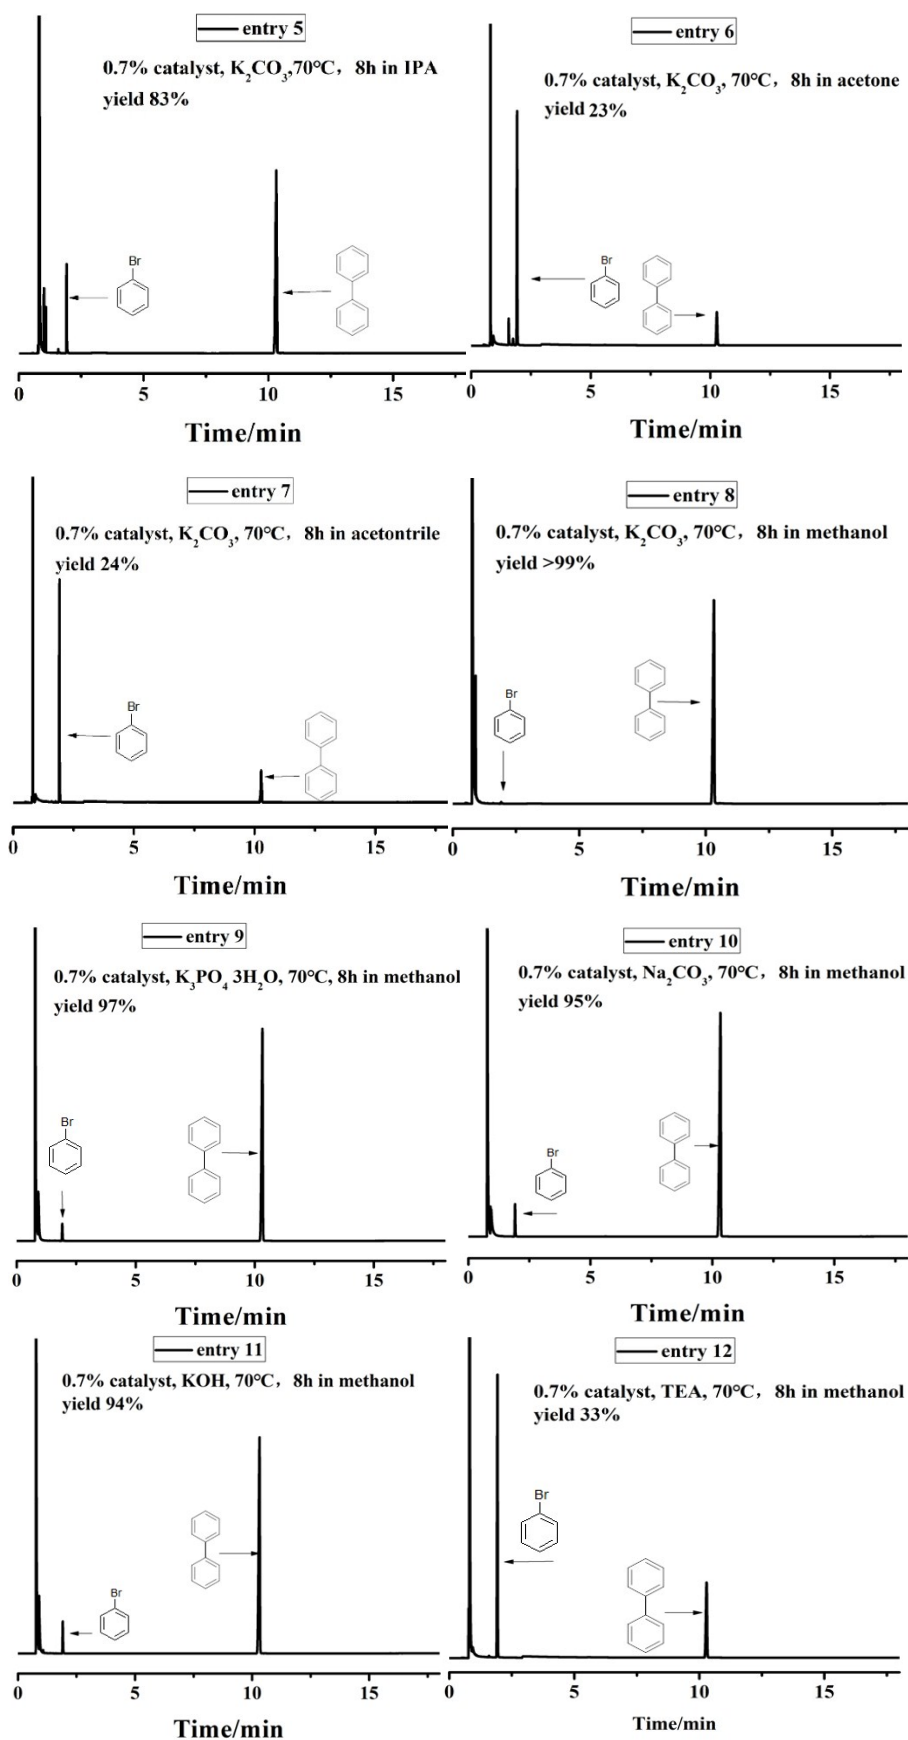

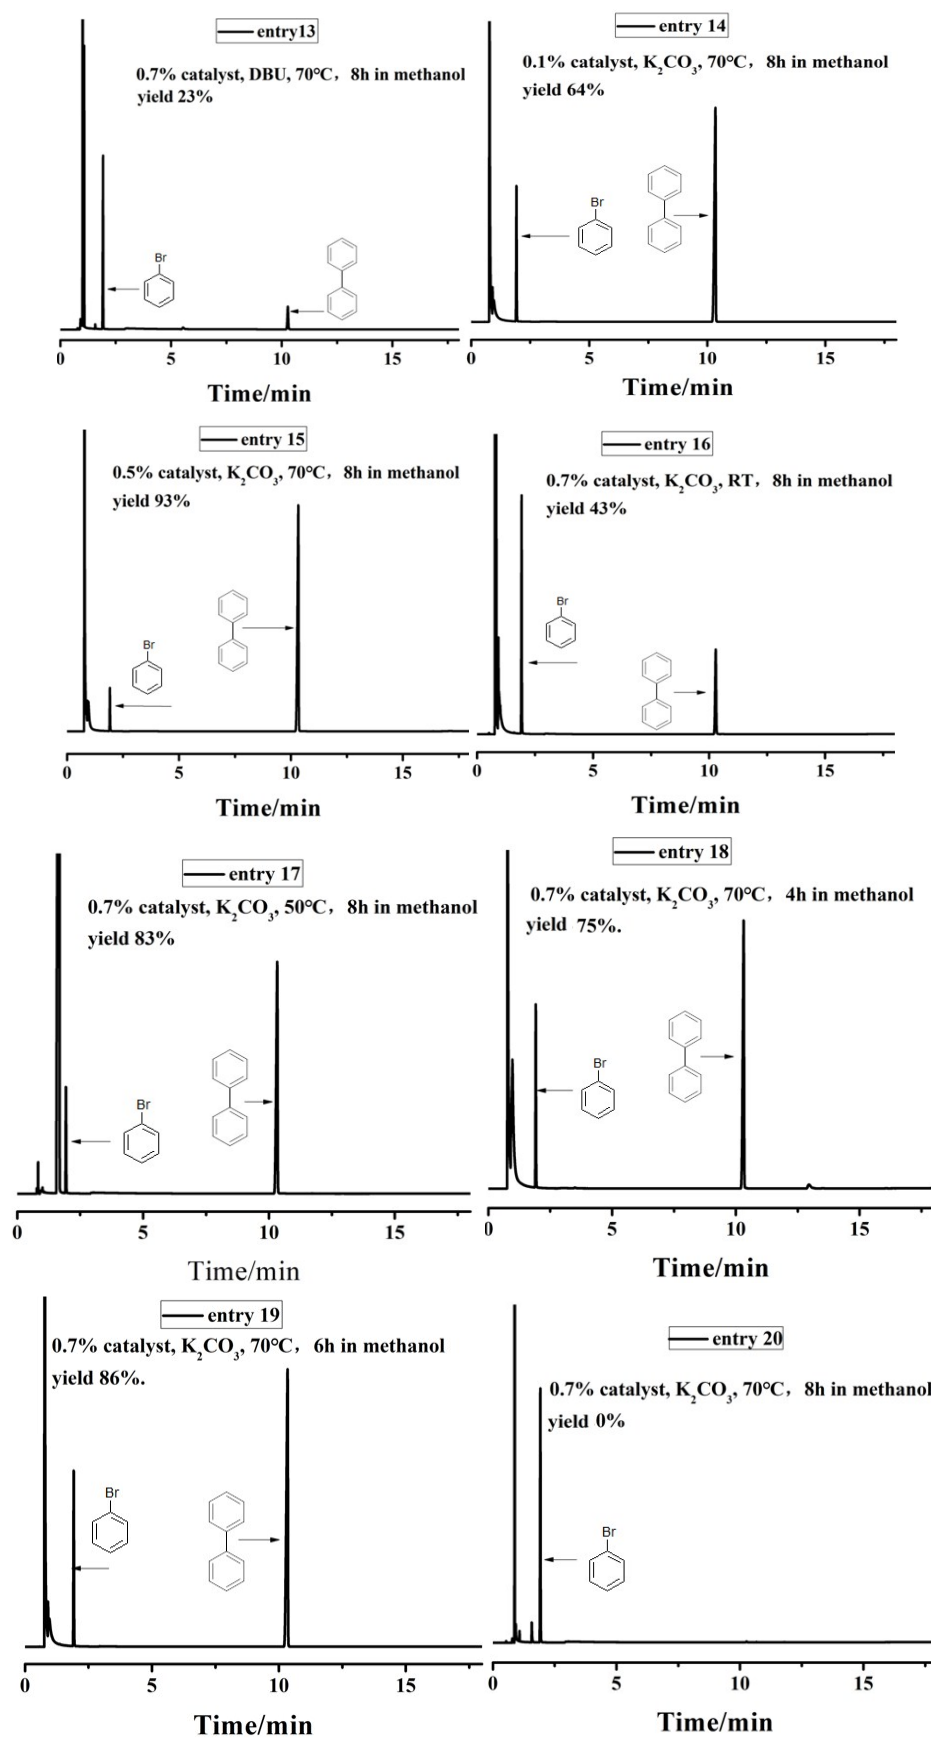

**Fig. S6** GC analysis for the model Suzuki-Miyaura cross-coupling reaction catalyzed by **Pd-OMF** under different reaction conditions (for Table 1).

## 5. Recycle of Pd-OMF

After each catalytic run, the solid catalyst of **Pd-OMF** was recovered by centrifugation, washed with  $\text{CH}_3\text{CN}$  ( $3 \times 2$  mL),  $\text{CHCl}_3$  ( $3 \times 2$  mL), and dried at  $110^\circ\text{C}$  for 24 h in vacuum, and then was reused for the next catalytic run under the same reaction conditions. After multiple catalytic runs, **Pd-OMF** was characterized by element analysis and ICP again. Anal. Calcd for the desolvated sample  $\text{C}_{51}\text{H}_{54}\text{I}_3\text{N}_3\text{Pd}_{1.5}$ : C 49.03, H 4.36, N 3.36. Found: C 49.52, H 4.45, N 3.44. Pd and I content in **Pd-OMF** were determined as 12.33 (calcd. 12.78 wt%) and 30.38 wt% (calcd. 30.47 wt%), respectively.

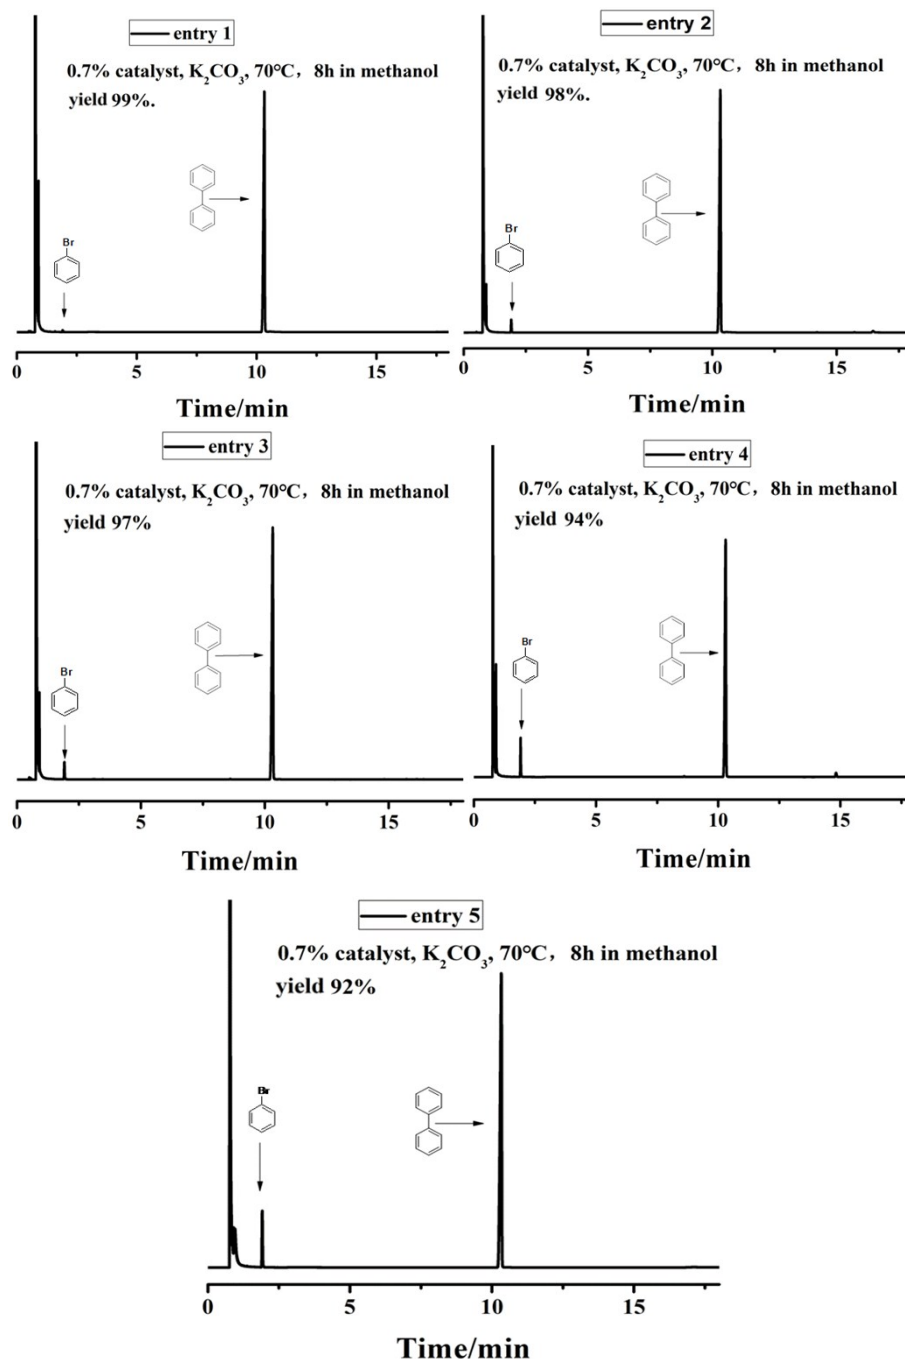

**Fig. S7** GC analysis for the Suzuki cross-coupling reaction catalyzed by **Pd-OMF** for 5 catalytic runs.

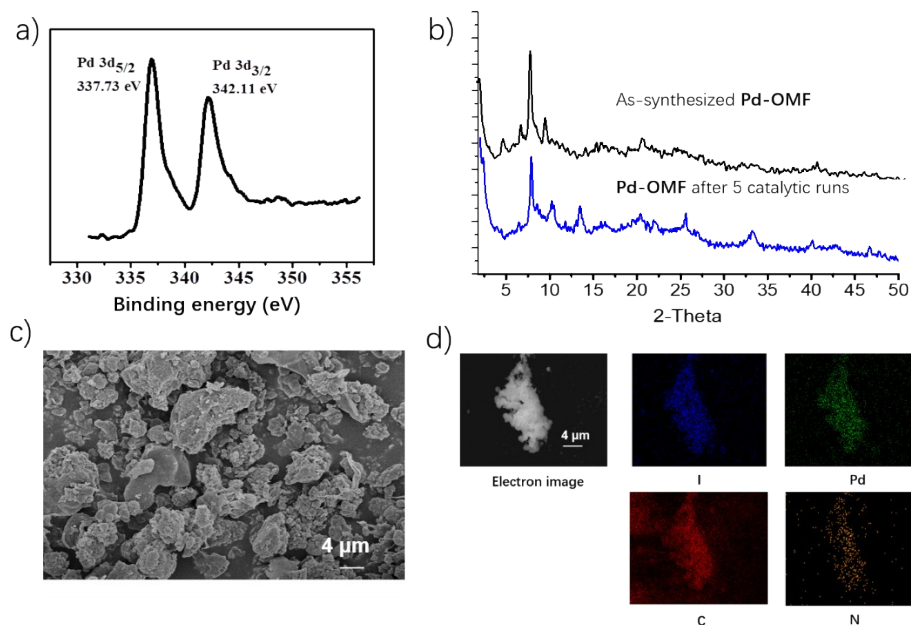

**Fig. S8** XPS (a), PXRD (b), SEM (c), SEM-EDX (d) spectra of the **Pd-OMF** after five catalytic runs.

## 6. General catalytic procedure for the Pd-OMF promoted Suzuki-Miyaura cross-coupling reaction (for Table 2)

A mixture of halogeno-benzene (1.0 mmol), phenylboronic acid (1.1 mmol, 0.134 g),  $K_2CO_3$  (2 mmol, 0.276 g) and **Pd-OMF** (6.6 mg, 0.7 mol% Pd equiv) in methanol (2 mL) was stirred at 70 °C for 7-8 h in  $N_2$  to afford the corresponding products. Yield was determined by the GC.

## 7. GC results for the Pd-OMF promoted Suzuki-Miyaura cross-coupling reaction (for Table 2)

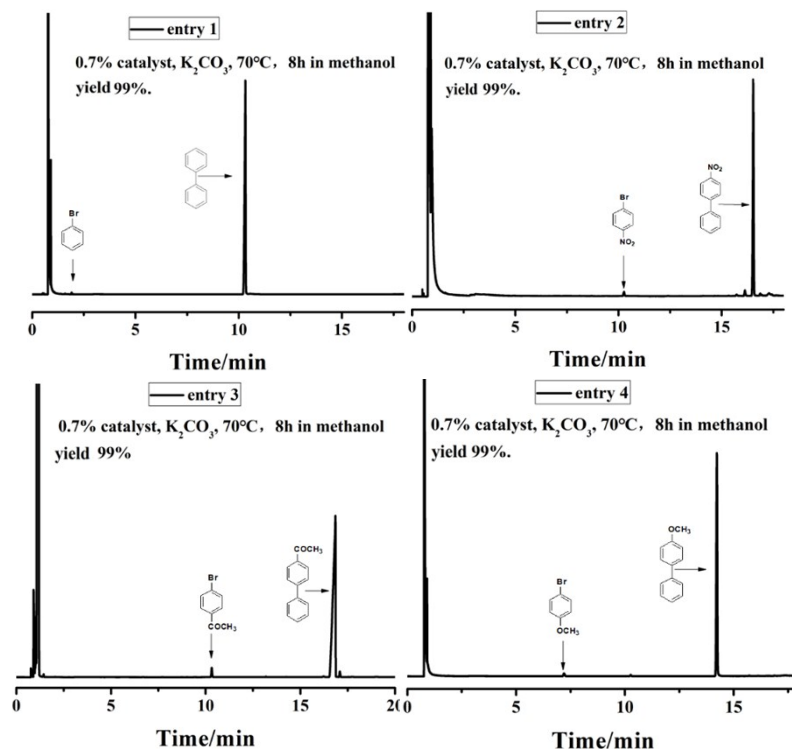

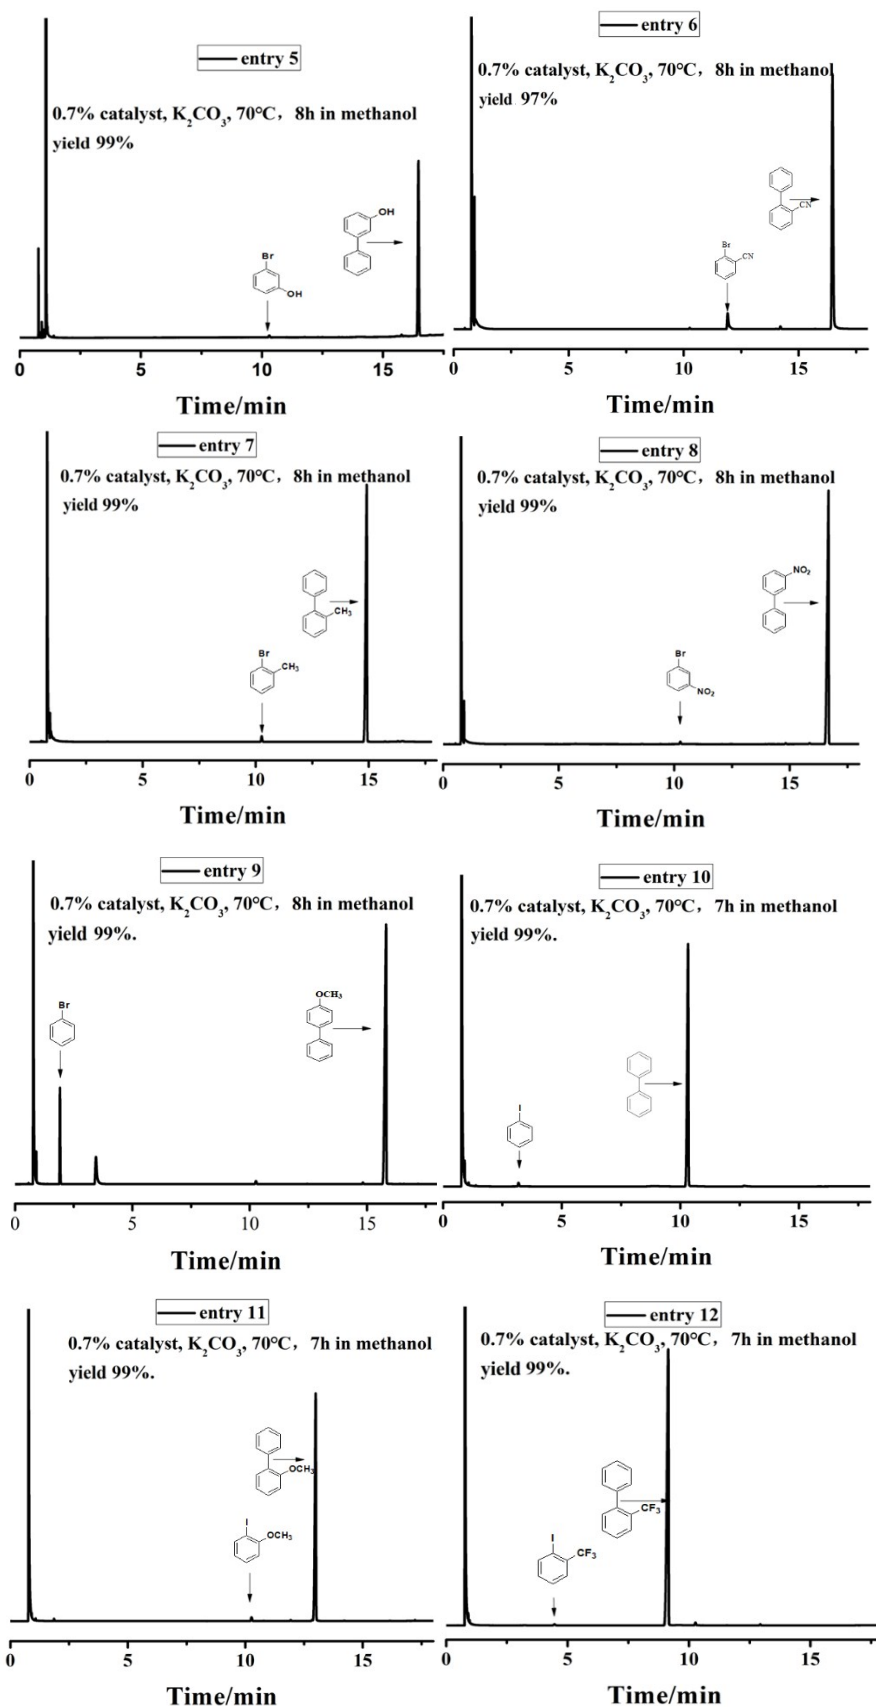

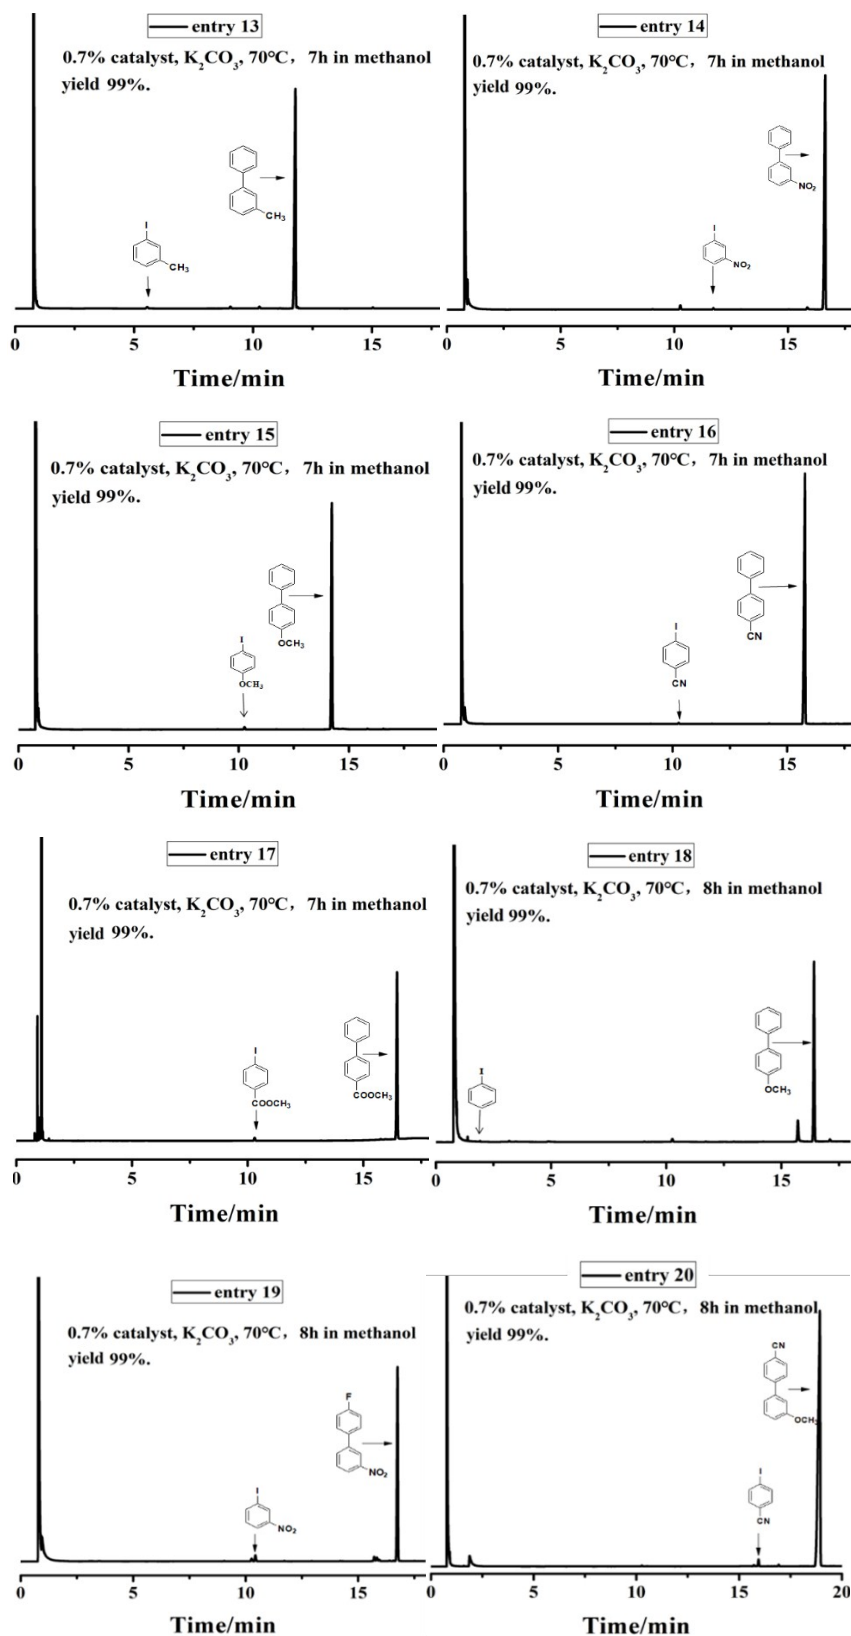

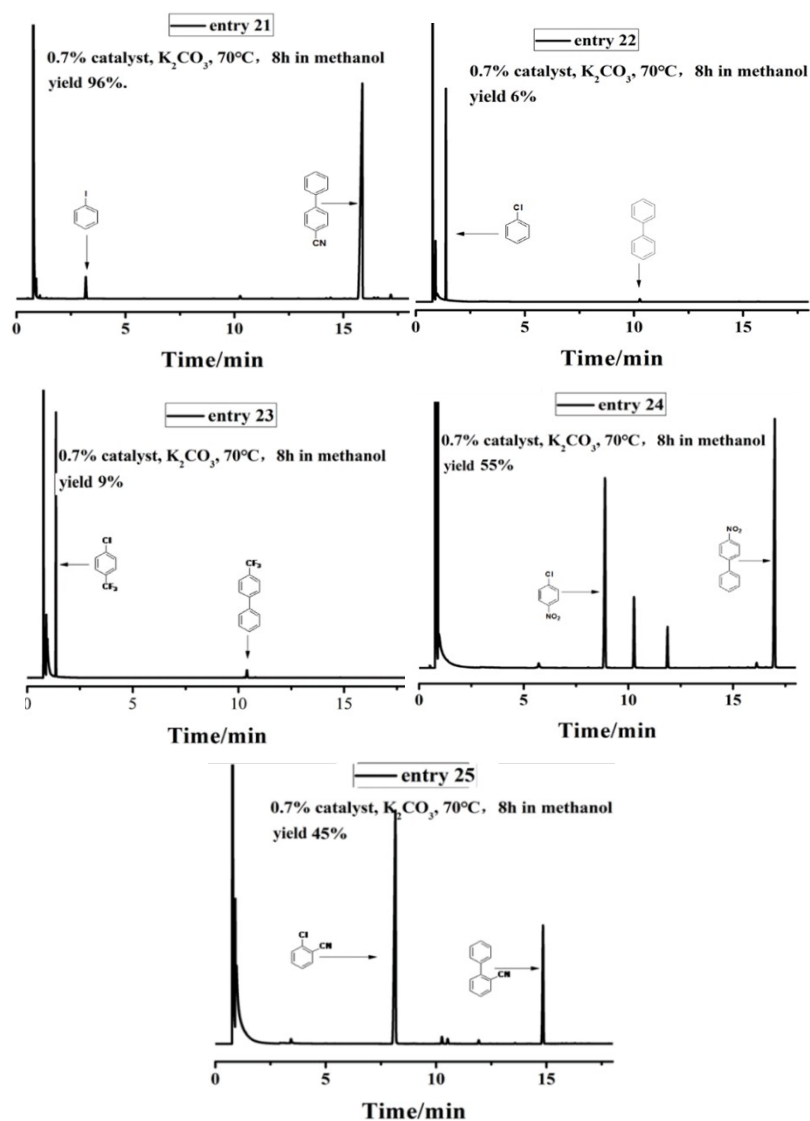

**Fig. S9** GC results for the Suzuki-Miyaura cross-coupling reactions with various halogenobenzenes and phenylboronic acids catalyzed by **Pd-OMF** under given conditions (for Table 2).

## 8. Proposed mechanism

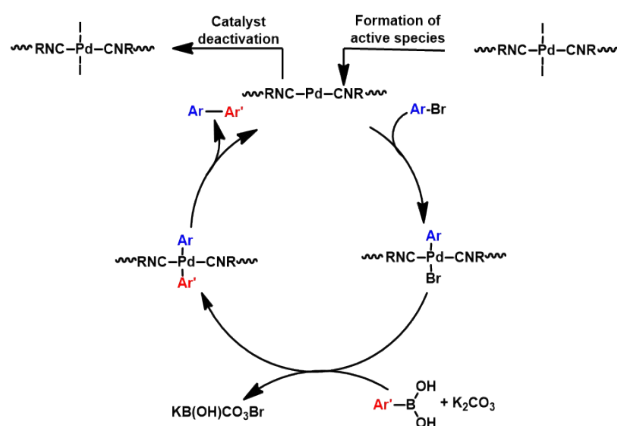

**Fig. S10** Proposed mechanism for the model Suzuki-Miyaura cross-coupling reaction catalyzed by **Pd-OMF**.

## 9. Reference

- (1) (a) Z.-L. Lu, A. Mayr, K.-K. Cheung, *Inorg. Chim. Acta.* 1999, **284**, 205-214. (b) Y.-B. Dong, L. Yang, K.-K. Cheung, A. Mayr, *J. Organomet. Chem.* 2000, **598**, 55–62.
- (2) D. W. Price, S. M. Dirk, F. Maya, J. M. Tour, *Tetrahedron* 2003, **59**, 2497-2518.
- (3) L. A. Büldt, X. W. Guo, A. Prescimone, O. S. A, Wenger, *Angew. Chem. Int. Ed.* 2016, **55**, 11247-11250.
- (4) A. Mayr, L. F. Mao, *Inorg. Chem.* 1998, **37**, 5776-5780.
